# Supplementary material
Source: PubMed Central journal article supplement (PMC6549299)
Supplement: jama-321-2092-s001.pdf [file jama-321-2092-s001.pdf]

1 **Supplement 1:** Study protocol previously published in *Trials*. 2015 Apr 10;16:144. doi:  
2 10.1186/s13063-015-0648-7.

### 3 **Background**

4 Falls are a common geriatric syndrome<sup>1</sup> and are the third leading cause of chronic disability worldwide.<sup>2</sup> Falls  
5 impose significant risk for hospitalization, institutionalization, and even death.<sup>3-5</sup> About 30% of community-  
6 dwellers over the age of 65 experience one or more falls every year,<sup>6</sup> with half of these seniors experiencing  
7 recurrent falls. With the proportion of older adults increasing, falls will continue to place an increasing health and  
8 economic burden on the public health system

9 Exercise can effectively reduce falls. Specifically, New Zealand researchers designed a physical therapist-  
10 delivered, progressive home-based strength and balance training program tailored for seniors.<sup>7-11</sup> This intervention  
11 – the Otago Exercise Program (OEP) – has demonstrated benefit in four randomized trials of community-dwelling  
12 seniors selected based on age alone.<sup>7-11</sup> Hence, the OEP qualifies as primary falls prevention (that is, preventing  
13 falls among those without a history of falls). The Cochrane Collaboration<sup>12</sup> explicitly identifies the OEP as the  
14 exercise training program with the strongest evidence for falls prevention.

15 Although the OEP is the exercise training program with the strongest evidence for primary falls prevention, no  
16 randomized controlled trial (RCT) powered for falls has evaluated the efficacy of the OEP as a secondary falls  
17 prevention (that is, preventing falls among those with a history of falls) strategy. Hence, a rigorously designed  
18 RCT with falls as the primary outcome is an essential next step to determine the role of OEP in preventing falls  
19 among senior men and women with a significant history of falls. Previous research has demonstrated that the best  
20 value for money of various falls prevention strategies comes from targeting high-risk groups.<sup>13</sup>

21 Improved physiological function is the generally accepted mechanism underlying the effectiveness of the OEP in  
22 reducing falls.<sup>8</sup> However, in a meta-analysis of four OEP randomized trials, falls were significantly reduced by  
23 35% while postural sway significantly improved by only 9% and there was no significant improvement in knee  
24 extension strength.<sup>11</sup> Hence, the OEP may reduce falls via mechanisms other than improved physiological  
25 function. Specifically, we have demonstrated proof-of-concept data suggesting that improved cognitive function  
26 may be a very important mechanism by which the OEP reduces falls.<sup>14</sup>

27 Within the multiple domains of cognitive function, reduced executive functions are associated with falls.<sup>15-19</sup>  
28 Executive functions are higher order cognitive processes that control, integrate, organize, and maintain other  
29 cognitive abilities.<sup>20</sup> Executive functions decline substantially with aging.<sup>21</sup> Importantly, reduced executive  
30 functions are prevalent among healthy, community-dwelling seniors with intact global cognitive function (that is,  
31 Mini-Mental State Examination (MMSE) score  $\geq 24/30$ ).<sup>22,23</sup> This is not surprising given that many of the  
32 pathological changes (for example, white matter lesions) associated with reduced executive functions are  
33 prevalent but clinically silent.<sup>24</sup>

34 Our proof-of-concept study provided preliminary evidence that the OEP may improve executive functions in  
35 senior fallers.<sup>14</sup> Given the association between executive functions, exercise, and falls, we hypothesize that  
36 improved executive functions may be an important mechanism by which exercise reduces falls. However, this  
37 hypothesis is yet to be tested. Furthermore, our proof-of-concept study did not have the sample size to explore  
38 whether the observed change in cognitive function was a mediator of the benefit of the OEP.

39 Thus, we propose a 12-month RCT among community-dwelling seniors aged 70 years and older who attend a  
40 secondary falls prevention clinic to assess the efficacy and the cost-effectiveness of the OEP as a secondary falls  
41 prevention strategy. Further, we aim to explore the relative importance of both physiological and cognitive factors  
42 to falls reduction. Given the immense health and financial burden imposed by falls, our proposed RCT could have  
43 significant impact on the health of Canadian seniors and the Canadian health care system.

## 44 **Methods**

### 45 **Design**

46 We propose a RCT of 344 community-dwelling senior with a history of falls (that is, one or more falls in the past  
47 12 months), aged 70 and older. Participant randomized to the OEP intervention group will receive the intervention  
48 for 12-months. There will be three measurement sessions with monthly monitoring.

### 49 **Setting**

50 All participants will be recruited from the Falls Prevention Clinic at Vancouver General Hospital ([www.fallsclinic.ca](http://www.fallsclinic.ca)).

### 51 **Participants**

52 All participants attending the Falls Prevention Clinic have sustained one or more falls in the past 12 months.  
53 Referrals to the Falls Prevention Clinic are from health care professionals (for example, physicians) for those who  
54 sought medical attention for their fall. Patients who attend the Falls Prevention Clinic receive falls risk factor  
55 assessment followed by a comprehensive geriatric assessment. The Falls Prevention Clinic care pathway is based  
56 on the American Geriatrics Society/British Geriatrics Society/American Academy of Orthopedic Surgeons Falls  
57 Prevention Guidelines<sup>25</sup> (which is hereafter referred to as “standard of care”).

58 Charts from the clinic will be reviewed on a weekly basis to identify eligible participants. Those who appear  
59 eligible based on detailed chart review will be mailed an information package and asked to call a research assistant  
60 if they are interested in participating in the study. When phone contact generates a person’s agreement to  
61 participate, a research assistant will follow-up with a home visit. During this home visit, the consent form will be  
62 reviewed. Once written informed consent is obtained, the research assistant will complete the baseline assessment.  
63 Upon completion of the assessment, the research assistant who will remain blinded to group allocation will contact  
64 the research coordinator who will access the central randomization service to reveal the treatment allocation.

### 65 **Eligibility**

#### 66 ***Inclusion criteria***

- 67 1) Adults  $\geq 70$  years referred by a medical professional to the Falls Prevention Clinic as a result of seeking  
68 medical attention for a non-syncopal fall in the previous 12 months
- 69 2) Understands, speaks, and reads English proficiently
- 70 3) MMSE<sup>26</sup> score  $\geq 24/30$
- 71 4) A Physiological Profile Assessment (PPA<sup>®</sup>; Prince of Wales Medical Research Institute, Sydney,  
72 Australia)<sup>27</sup> score of at least 1.0 standard deviation above age-normative value  
73 or  
74 Timed Up and Go (TUG)<sup>28</sup> test performance of greater than 15 seconds  
75 or  
76 one additional non-syncopal fall in the previous 12 months
- 77 5) Expected to live greater than 12 months (based on the geriatricians’ expert opinion);
- 78 6) Living in the Greater Vancouver area
- 79 7) Community-dwelling (that is, not residing in a nursing home, extended care unit, or assisted-care facility)
- 80 8) Able to walk 3 meters with or without an assistive device
- 81 9) Able to provide written informed consent

#### 82 ***Exclusion criteria***

- 83 1) Previously diagnosed with or suspected (by the geriatrician) to have neurodegenerative disease (for  
84 example. Parkinson’s disease)
- 85 2) Previously diagnosed with or suspected (by the geriatrician) to have dementia (of any type)
- 86 3) Had a stroke
- 87 4) Have a history indicative of carotid sinus sensitivity (that is, syncopal falls)

88 Ethical approval has been obtained from the Vancouver Coastal Health Research Institute (V10-70171, 11 May  
89 2004) and the University of British Columbia's Clinical Research Ethics Board (H04-70171, 11 May 2004).

## 90 **Power calculation**

91 The primary outcome is self-reported number of falls over the 12 month follow-up period. Traditionally, the  
92 Poisson distribution is used to model count data. However, with recurrent event data the assumption of equal  
93 mean and variance of the Poisson model is often violated, thus the sample size calculation employs an  
94 overdispersed Poisson model (i.e., a negative binomial regression model).<sup>29</sup> Assuming an average fall rate in the  
95 control group of 1.0 falls per year, an average follow-up of 0.9 years and an overdispersion parameter,  $\phi$ , of 1.6  
96 we require 163 seniors per group to have 80% power to detect a 35% relative reduction in fall rate – i.e., 1.0  
97 versus 0.65 falls per year. To accommodate a complete loss to follow-up rate of 5% (i.e., no fall diaries returned)  
98 we will recruit a total of 344 seniors (i.e. 172 per group). The estimate of the control fall rate comes from the  
99 pooled analysis of 4 trials in a similar population.<sup>11</sup> The estimate of the overdispersion parameter comes from  
100 analysis of the data in Table 2 of Shumway-Cook<sup>30</sup> which yields  $\phi=1.6$ . The estimate for the average length of  
101 follow-up is based on our previous proof-of-concept study conducted locally in the same patient population in  
102 Greater Vancouver.<sup>14,31</sup> Only one of 74 participants returned no fall diaries so our estimate of a 5% complete loss  
103 to follow-up rate is conservative.<sup>31</sup>

## 104 **Measurements**

105 Baseline measurements will be obtained prior to randomization. There will be three measurement sessions:  
106 baseline, 6 months, and 12 months.

### 107 *Falls prevention clinic visit*

108 The measurements listed below are acquired as part of the Falls Prevention Clinic visit and will be collected as  
109 the participants' baseline values upon informed consent.

### 110 *Anthropometry*

111 Standing height is measured as stretch stature to 0.1 cm per standard protocol. Weight will be measured to 0.1 kg  
112 on a calibrated digital scale.

### 113 *Geriatrician examination*

114 All patients undergo a comprehensive geriatrician assessment based on the American Geriatrics Society/British  
115 Geriatrics Society/American Academy of Orthopedic Surgeons Falls Prevention Guidelines.<sup>25</sup>

### 116 *General health, falls history, and socioeconomic status*

117 General health, falls history in the last 12 months, and socioeconomic status are ascertained by questionnaires.

### 118 *Global cognitive function*

119 Global cognitive function is assessed using both the MMSE<sup>26</sup> and the Montreal Cognitive Assessment (MoCA).<sup>32</sup>  
120 The MoCA is a brief 30-point screening tool for mild cognitive impairment with high sensitivity and specificity.  
121 Specifically, it is more sensitive than the MMSE in detecting mild cognitive impairment. Using a cut-off score of  
122 26, the MMSE had a sensitivity of 18%, whereas the MoCA detected 90% of individuals with mild cognitive  
123 impairment.<sup>32</sup>

### 124 *Balance and mobility*

125 General balance and mobility will be assessed with the 1) Short Physical Performance Battery (SPPB);<sup>33</sup> and 2)  
126 TUG Test.<sup>28</sup> For the SPPB, participants are assessed on performances of standing balance, walking, and sit-to-

127 stand. Each component is rated out of four points, for a maximum of 12 points. Poor performance on this scale  
128 predicts subsequent disability.<sup>33</sup> For the TUG, participants are instructed to rise from a standard chair, walk a  
129 distance of three meters, turn, walk back to the chair and sit down. A TUG performance time of  $\geq 13.5$  seconds  
130 correctly classified persons as fallers in 90% of cases.<sup>34</sup>

131 We will use the PPA<sup>©27</sup> (Prince of Wales Medical Research Institute, AUS) to assess physiological falls risk. The  
132 PPA is a valid and reliable tool for falls risk assessment. Based on the performance of five physiological domains  
133 (postural sway, hand reaction time, quadriceps strength, proprioception, and edge contrast sensitivity), the PPA  
134 computes a falls risk score for each individual and this measure has a 75% predictive accuracy for falls in older  
135 people.<sup>27</sup> A PPA z-score of 0-1 indicates mild risk, 1-2 indicates moderate risk, 2-3 indicates high risk, and 3 and  
136 above indicates marked risk.<sup>35</sup>

### 137 *Mood*

138 We will use the 15-item Geriatric Depression Scale (GDS)<sup>36,37</sup> to screen for depression. The GDS specifically  
139 assesses for depressed mood in older people and a score of 5 and greater indicates depression.<sup>37</sup>

### 140 *Co-morbidity*

141 The Functional Co-morbidity Index was calculated to estimate the degree of co-morbidity associated with physical  
142 functioning.<sup>38</sup>

### 143 *Instrumental Activities of Daily Living scale*

144 The Lawton and Brody<sup>39</sup> Instrumental Activities of Daily Living Scale screens for impaired IADLs. This scale  
145 subjectively assesses ability to telephone, shop, prepare food, housekeep, do laundry, handle finances, be  
146 responsible for taking medication, and determining mode of transportation.

### 147 *Baseline home visit*

148 The following additional measures will be acquired during the home visit when written consent is obtained. The  
149 maximum time lag between the baseline Falls Prevention Clinic visit and the home visit is 1 month.

### 150 *Falls-related self-efficacy*

151 Falls-related self-efficacy will be assessed by the Activities-Specific Balance Confidence (ABC) Scale. The 16-  
152 item ABC Scale<sup>40</sup> assesses falls-related self-efficacy with each item rated from 0% (no confidence) to 100%  
153 (complete confidence). The ABC Scale score is correlated with other measures of self-efficacy, distinguishes  
154 between individuals of low and high mobility, and corresponds with balance performance measures.<sup>41,42</sup>

### 155 *Physical activity level*

156 Current physical activity level will be assessed by the valid and reliable Physical Activities Scale for the Elderly  
157 questionnaire.<sup>43,44</sup> This 12-item scale measures the average number of hours per day spent participating in leisure,  
158 household, and occupational physical activities over the previous 7-day period.

### 159 *Executive functions*

160 There is no unitary executive function – rather, there are distinct processes. Thus, no single measure of executive  
161 function can adequately tap the construct in its entirety. Within the context of our proposal, we refer to work by  
162 Miyake and colleagues<sup>45</sup> who identified three key executive processes: 1) set shifting; 2) updating (or working  
163 memory); and 3) selective attention and conflict resolution (or response inhibition). Set shifting requires one to  
164 go back and forth between multiple tasks or mental sets.<sup>45</sup> Updating involves monitoring incoming information  
165 for relevance to the task at hand and then appropriately updating the informational content by replacing old, no  
166 longer relevant information with new incoming information. Conflict resolution involves deliberately inhibiting  
167 dominant, automatic, or prepotent responses. We will assess: 1) set shifting using the Trail Making Test (Part A

168 and B);<sup>46</sup> 2) updating (that is, working memory) using the verbal digits forward and backward test;<sup>47</sup> and 3)  
169 response inhibition using the Stroop Colour-Word Test.<sup>48</sup> These standardized neuropsychological tests are  
170 sensitive to age-<sup>46,49</sup> and intervention-related changes.<sup>50-54</sup> Executive functions and information processing speed  
171 will also be measured using the Digit Symbol Substitution Test.<sup>46</sup> For this task, participants are first presented  
172 with a series of numbers (1 to 9) and their corresponding symbols. They are asked to draw the correct symbol for  
173 any digit placed randomly in pre-defined series in 60 seconds. A higher number of correct answers in this time  
174 period indicates better executive functions and processing speed.

## 175 *Verbal fluency*

176 Defined as the rate at which an individual can generate words, verbal fluency will be assessed using both the FAS  
177 test (which assesses phonemic verbal fluency) and the animal naming test (which assesses semantic verbal  
178 fluency).<sup>46</sup> For the FAS verbal fluency test, participants will be asked to verbally generate as many words  
179 (excluding proper names) as they can starting with the letters “F”, “A” and “S”, each in 60 seconds [48]. The total  
180 number of words generated for all three letters will be used as the measure of performance. For the animal naming  
181 test, participants will be asked to generate a list of animal names in 60 seconds.<sup>46</sup>

## 182 *Health-related quality of life*

183 We will evaluate health-related quality of life using Euro-Qol-5D three level (EQ-5D-3 L).<sup>55</sup> The EQ-5D  
184 ascertains health status according to the following domains: mobility, self-care, usual activities, pain, and  
185 anxiety/depression. We will calculate quality-adjusted life years using the weightings from each instrument to  
186 compare differences in the incremental cost-effectiveness ratios.

## 187 *Monthly measurement*

188 The following measures will be collected monthly by telephone: 1) current physical activity level as assessed by  
189 the Physical Activities Scale for the Elderly questionnaire; and 2) health-related quality of life as assessed by the  
190 Short Form 6D,<sup>56</sup> EuroQol EQ-5D-3 L,<sup>55</sup> and Health Utilities Index Mark 3.<sup>57</sup> Strategies to promote adherence to  
191 the OEP exercises during these monthly phone calls will also occur.

192 Through monthly calendars and diaries, participants will be asked to provide the following information: 1) falls  
193 and adherence to the OEP (ascertainment of falls and adherence to the OEP will be documented on monthly  
194 calendars); and 2) health care resource utilization and costs (participants will complete monthly health care  
195 resource use diaries over the 12-month study period).

## 196 **Randomization**

197 Participants will be randomly assigned (1:1) to either the OEP (plus standard of care) group or the standard of  
198 care (control) group. The randomization sequence will be stratified by: 1) sex, as falls rate is different between  
199 men and women; and 2) geriatrician (LD and WC), as standard of care delivery may differ between physicians.  
200 Permuted blocks of varying size (for example, 2,4,6) will be employed. To ensure concealment of the treatment  
201 allocation, the randomization sequences will be generated and held by a central Internet randomization service.

## 202 **Planned trial interventions**

### 203 *Otago Exercise Program intervention*

204 The OEP is an individualized home-based balance and strength retraining program.<sup>8,58</sup> It consists of the following  
205 strengthening exercises: knee extensor (4 levels), knee flexor (4 levels), hip abductor (4 levels), ankle  
206 plantarflexors (2 levels), and ankle dorsiflexors (2 levels). The balance retraining exercises consist of the  
207 following: knee bends (4 levels), backwards walking (2 levels), walking and turning around (2 levels), sideways  
208 walking (2 levels), tandem stance (2 levels), tandem walk (2 levels), one leg stand (3 levels), heel walking (2  
209 levels), toe walking (2 levels), heel toe walking backwards (1 level), and sit to stand (4 levels).

210 Licensed physical therapists will deliver the OEP after a standard training session with the research team. For  
211 each OEP participant, a physical therapist will visit the home and prescribe a set of suitable exercises from the  
212 OEP manual. The same physical therapist will return bi-weekly three additional times to make progressive  
213 adjustments to the exercise protocol according to the OEP manual. Each of these four visits in the first 2 months  
214 will take approximately 1 hour. The physical therapist's fifth visit will occur 6 months after the initial visit. During  
215 this last visit, the physical therapist will check that the OEP exercises are being done correctly and will also  
216 encourage the participant to continue with the exercise program. Overall, the participant is asked to perform the  
217 OEP balance and strength retraining exercises three times per week (approximately 30 minutes). In addition to  
218 the OEP manual, which contains a picture and description of each exercise, each participant will be provided with  
219 an adjustable cuff weight (in 0.9 kg increments; range = 0.9 to 9 kg) to be used with the OEP strength training  
220 exercises. Based on data from our proof-of-concept study [15], the OEP is safe for our target population; only 2  
221 of the 36 OEP participants reported low back pain as adverse events.

## 222 *Standard of care*

223 Participants randomized to "standard of care" they receive standard of care – visits with a geriatrician.

## 224 **Adverse events monitoring**

225 A physician and a statistician external to the daily activities of this study will review and compile a report for all  
226 adverse events reported in the study on a monthly basis. They will stop the study if the adverse event data  
227 demonstrate any hazards of the intervention (for example, increased falls or fracture) based on the monthly report.

## 228 **Statistical analyses**

229 Our primary, secondary, and tertiary analyses will follow the intention-to-treat principle (that is, all individuals  
230 will be analyzed according to their group allocation regardless of compliance).

## 231 *Primary outcome*

232 The rate of falls (the primary outcome) will be compared between the two groups using a negative binomial  
233 regression model. The treatment assignment and stratification factors will be included in the model as covariates.  
234 Point and interval estimates for the rate ratio will be determined.

## 235 *Secondary outcomes*

236 We will conduct exploratory analyses on the secondary outcomes (PPA, TUG test and Short Performance Physical  
237 Battery). Given that a potential source of bias in this trial will result from patients being unblinded to their group  
238 allocation, group will be controlled for in all secondary analyses.

## 239 *Economic evaluation*

240 Our economic evaluation will examine the incremental costs and benefits generated by using the OEP intervention  
241 versus standard of care. The outcome of our cost effectiveness analysis is the incremental cost-effective ratio  
242 (ICER). By definition, an ICER is the difference between the mean costs of providing the competing interventions  
243 divided by the difference in effectiveness, where  $ICER = \Delta cost / \Delta effect$  [59]. Both a cost-effectiveness analysis  
244 and a cost utility analysis will be performed. Based on the primary outcome of the RCT, we will determine the  
245 incremental cost of the OEP intervention per fall avoided, relative to standard treatment. We will also conduct a  
246 cost-utility analysis. In a cost-utility analysis, the primary outcome is the quality-adjusted life years. These are  
247 calculated based on the quality of life of a patient (measured using health utilities) in a given health state and the  
248 time spent in that health state. An important aspect of economic evaluations conducted alongside an RCT is how  
249 to deal with missing data due to attrition. We will follow recommendations by Oostenbrick<sup>59</sup> and Briggs,<sup>60</sup> and  
250 the International Society for Pharmacoeconomics and Outcomes Research,<sup>61</sup> in dealing with missing cost and  
251 effectiveness data. We will use a combination of imputation and bootstrapping to quantify uncertainty due to  
252 missing values.

253 **Mediation analysis**

254 We will use path analysis – a special case of structural equation modeling where all variables are observed – to  
255 investigate how physiological function and cognitive function mediate the effect of the intervention on the primary  
256 outcome (that is, falls). Using Mplus 5.1 ([www.statmodel.com](http://www.statmodel.com)) we will fit a negative binomial regression model  
257 that includes one independent variable and mediator variables.

258 **Discussion**

259 Our interdisciplinary research team will use a multi-pronged approach to explore the utility of OEP among seniors  
260 at high risk of future falls. The proposed trial may have important public health, economic, and mechanistic  
261 implications.

262 **Public health**

263 The simple and proven exercise program (that is, the OEP) has already been implemented nationally in New  
264 Zealand. Therefore, if our study demonstrates the OEP is an efficacious and efficient (that is, cost-effective)  
265 secondary falls prevention program, our findings could be rolled out immediately by policy makers.

266 **Economic**

267 The parallel economic evaluation is particularly important because, if the intervention proved to be cost-effective  
268 compared with standard of care, it would provide a strong argument for the OEP in the target population even at  
269 a time of fiscal restraint. We highlight that this intervention, the OEP, already has manuals, websites, and  
270 educational material ready for a ‘turn-key’ operation.

271 **Mechanistic**

272 Better understanding of the primary mechanisms underlying the OEP (that is, our tertiary research objective)  
273 would increase our capacity to refine and develop novel interventions for secondary falls prevention for the aging  
274 population. If improved executive functions prove to play a significant role in falls reduction, it would be a major  
275 contribution to knowledge in this field.

276 **Abbreviations**

277 ABC, Activities-Specific Balance Confidence; EQ-5D-3L, Euro-Qol 5D three level version; ICER, incremental  
278 cost-effective ratio; MMSE, Mini-Mental State Examination; MoCA, Montreal Cognitive Assessment; OEP,  
279 Otago Exercise Program; PPA, Physiological Profile Assessment; RCT, randomized controlled trial; TUG, Timed  
280 Up and Go.

281

## 282 REFERENCES

- 283 1. Inouye SK, Studenski S, Tinetti ME, Kuchel GA. Geriatric Syndromes: Clinical,  
284 Research, and Policy Implications of a Core Geriatric Concept. (See Editorial  
285 Comments by Dr. William Hazzard on Pp 794-796). *Journal of the American Geriatrics*  
286 *Society*. 2007;55(5):780-791.
- 287 2. Murray C, Lopez A. Global and Regional Descriptive Epidemiology of Disability:  
288 Incidence, Prevalence, Health Expectancies, and Years Lived with Disability. In:  
289 Murray C, Lopez A, eds. *The Global Burden of Disease*. Boston: The Harvard School  
290 of Public Health; 1996:201-246.
- 291 3. Pluijm S, Smit J, Tromp E, et al. A Risk Profile for Identifying Community-Dwelling  
292 Elderly with a High Risk of Recurrent Falling: Results of a 3-Year Prospective Study.  
293 *Osteoporosis International*. 2006/03// 2006;17(3):417-425.
- 294 4. Formiga F, Navarro M, Duaso E, et al. Factors Associated with Hip Fracture-Related  
295 Falls among Patients with a History of Recurrent Falling. *Bone*. Nov 2008;43(5):941-  
296 944.
- 297 5. Rockwood K, Stolee P, McDowell I. Factors Associated with Institutionalization of  
298 Older People in Canada: Testing a Multifactorial Definition of Frailty. *Journal of the*  
299 *American Geriatrics Society*. 1996;44(5):578-582.
- 300 6. Tinetti ME, Speechley M, Ginter SF. Risk Factors for Falls among Elderly Persons  
301 Living in the Community. *N Engl J Med*. Dec 29 1988;319(26):1701-1707.
- 302 7. Campbell AJ, Robertson MC, Gardner MM, Norton RN, Buchner DM. Falls Prevention  
303 over 2 Years: A Randomized Controlled Trial in Women 80 Years and Older. *Age*  
304 *Ageing*. Oct 1999;28(6):513-518.
- 305 8. Campbell AJ, Robertson MC, Gardner MM, Norton RN, Tilyard MW, Buchner DM.  
306 Randomised Controlled Trial of a General Practice Programme of Home Based  
307 Exercise to Prevent Falls in Elderly Women. *BMJ*. Oct 25 1997;315(7115):1065-1069.
- 308 9. Robertson MC, Devlin N, Gardner MM, Campbell AJ. Effectiveness and Economic  
309 Evaluation of a Nurse Delivered Home Exercise Programme to Prevent Falls. 1:  
310 Randomised Controlled Trial. *BMJ*. Mar 24 2001;322(7288):697-701.
- 311 10. Robertson MC, Gardner MM, Devlin N, McGee R, Campbell AJ. Effectiveness and  
312 Economic Evaluation of a Nurse Delivered Home Exercise Programme to Prevent  
313 Falls. 2: Controlled Trial in Multiple Centres. *BMJ*. Mar 24 2001;322(7288):701-704.
- 314 11. Robertson MC, Campbell AJ, Gardner MM, Devlin N. Preventing Injuries in Older  
315 People by Preventing Falls: A Meta-Analysis of Individual-Level Data. *J Am Geriatr*  
316 *Soc*. May 2002;50(5):905-911.
- 317 12. Gillespie LD, Robertson MC, Gillespie WJ, et al. Interventions for Preventing Falls in  
318 Older People Living in the Community. *Cochrane Database Syst Rev*. Apr 15  
319 2009(2):CD007146.
- 320 13. Davis JC, Robertson MC, Ashe MC, Liu-Ambrose T, Khan KM, Marra CA. Does a  
321 Home Based Strength and Balance Programme in People Aged  $\geq$  80 Years Provide  
322 the Best Value for Money to Prevent Falls?: A Systematic Review of Economic  
323 Analyses of Falls Prevention Interventions. *Br J Sports Med*. Aug 6 2009.
- 324 14. Liu-Ambrose T, Donaldson MG, Ahamed Y, et al. Otago Home-Based Strength and  
325 Balance Retraining Improves Executive Functioning in Older Fallers: A Randomized  
326 Controlled Trial. *J Am Geriatr Soc*. Oct 2008;56(10):1821-1830.
- 327 15. Rapport LJ, Webster JS, Flemming KL, et al. Predictors of Falls among Right-  
328 Hemisphere Stroke Patients in the Rehabilitation Setting. *Arch Phys Med Rehabil*. Jun  
329 1993;74(6):621-626.



- 330 16. Rapport LJ, Hanks RA, Millis SR, Deshpande SA. Executive Functioning and  
331 Predictors of Falls in the Rehabilitation Setting. *Arch Phys Med Rehabil.* 1998  
332 1998;79(6):629-633.
- 333 17. Lord S, Fitzpatrick R. Choice Stepping Reaction Time: A Composite Measure of Fall  
334 Risk in Older People. *J Gerontol.* 2001;10:M627-632.
- 335 18. Lundin-Olsson L, Nyberg L, Gustafson Y. "Stops Walking When Talking" as a  
336 Predictor of Falls in Elderly People. *Lancet.* Mar 1 1997;349(9052):617.
- 337 19. Anstey KJ, von Sanden C, Luszcz MA. An 8-Year Prospective Study of the  
338 Relationship between Cognitive Performance and Falling in Very Old Adults. *J Am*  
339 *Geriatr Soc.* Aug 2006;54(8):1169-1176.
- 340 20. Stuss DT, Alexander MP. Executive Functions and the Frontal Lobes: A Conceptual  
341 View. *Psychol Res.* 2000;63(3-4):289-298.
- 342 21. West RL. An Application of Prefrontal Cortex Function Theory to Cognitive Aging.  
343 *Psychol Bull.* Sep 1996;120(2):272-292.
- 344 22. Boone KB, Miller BL, Lesser IM, Hill E, D'Elia L. Performance on Frontal Lobe Tests  
345 in Healthy Older Individuals. *Dev Neuropsychol.* 1990;6:215-223.
- 346 23. Royall DR. Prevalence of Executive Control Function (Ecf) Impairment among Healthy  
347 Non-Institutionalized Retirees: The Freedom House Study. *Gerontologist.*  
348 1998;38S:314-315.
- 349 24. Thal DR, Del Tredici K, Braak H. Neurodegeneration in Normal Brain Aging and  
350 Disease. *Sci Aging Knowledge Environ.* Jun 9 2004;2004(23):pe26.
- 351 25. American Geriatrics Society. Guideline for the Prevention of Falls in Older Persons.  
352 *Journal of the American Geriatrics Society.* 2001;49:664-672.
- 353 26. Folstein MF, Folstein SE, McHugh PR. "Mini-Mental State". A Practical Method for  
354 Grading the Cognitive State of Patients for the Clinician. *J Psychiatr Res.*  
355 1975;12(3):189-198.
- 356 27. Lord S, Sherrington C, Menz H. A Physiological Profile Approach for Falls Prevention.  
357 *Falls in Older People. Risk Factors and Strategies for Prevention.* Cambridge:  
358 Cambridge University Press; 2001:221-238.
- 359 28. Whitney JC, Lord SR, Close JC. Streamlining Assessment and Intervention in a Falls  
360 Clinic Using the Timed up and Go Test and Physiological Profile Assessments. *Age*  
361 *Ageing.* Nov 2005;34(6):567-571.
- 362 29. Signorini D. Sample Size for Poisson Regression. *Biometrika.* 1991;78:446-450.
- 363 30. Shumway-Cook A, Silver IF, LeMier M, York S, Cummings P, Koepsell TD.  
364 Effectiveness of a Community-Based Multifactorial Intervention on Falls and Fall Risk  
365 Factors in Community-Living Older Adults: A Randomized, Controlled Trial. *J*  
366 *Gerontol A Biol Sci Med Sci.* Dec 2007;62(12):1420-1427.
- 367 31. Donaldson MG. *Falls Risk in Frail Seniors: Clinical and Methodological Studies.*  
368 Vancouver: Epidemiology, University of British Columbia; June 2007.
- 369 32. Nasreddine ZS, Phillips NA, Bedirian V, et al. The Montreal Cognitive Assessment,  
370 Moca: A Brief Screening Tool for Mild Cognitive Impairment. *J Am Geriatr Soc.* Apr  
371 2005;53(4):695-699.
- 372 33. Guralnik JM, Ferrucci L, Simonsick EM, Salive ME, Wallace RB. Lower-Extremity  
373 Function in Persons over the Age of 70 Years as a Predictor of Subsequent Disability.  
374 *N Engl J Med.* March 2, 1995 1995;332(9):556-562.
- 375 34. Shumway-Cook A, Brauer S, Woollacott M. Predicting the Probability for Falls in  
376 Community-Dwelling Older Adults Using the Timed up & Go Test. *PHYS THER.* Sep  
377 2000;80(9):896-903.
- 378 35. Lord SR, Menz HB, Tiedemann A. A Physiological Profile Approach to Falls Risk  
379 Assessment and Prevention. *PHYS THER.* Mar 2003;83(3):237-252.

- 380 36. Yesavage JA, Brink TL, Rose TL, et al. Development and Validation of a Geriatric  
381 Depression Screening Scale: A Preliminary Report. *J Psychiatr Res.* 1982;17(1):37-49.
- 382 37. van Marwijk HW, Wallace P, de Bock GH, Hermans J, Kaptein AA, Mulder JD.  
383 Evaluation of the Feasibility, Reliability and Diagnostic Value of Shortened Versions  
384 of the Geriatric Depression Scale. *Br J Gen Pract.* Apr 1995;45(393):195-199.
- 385 38. Groll DL, To T, Bombardier C, Wright JG. The Development of a Comorbidity Index  
386 with Physical Function as the Outcome. *J Clin Epidemiol.* Jun 2005;58(6):595-602.
- 387 39. Lawton MP, Brody EM. Assessment of Older People: Self-Maintaining and  
388 Instrumental Activities of Daily Living. *Gerontologist.* Autumn 1969;9(3):179-186.
- 389 40. Powell L, Myers A. The Activities-Specific Confidence (Abc) Scale. *J Gerontol.*  
390 1995;50A:M28-M34.
- 391 41. Myers A, Powell L, Maki B, Holliday P, Brawley L, Sherk W. Psychological Indicators  
392 of Balance Confidence: Relationship to Actual and Perceived Abilities. *J Gerontol.*  
393 1996;51A:M37-M43.
- 394 42. Myers A, Fletcher P, Myers A, Sherk W. Discriminative and Evaluative Properties of  
395 the Activities-Specific Balance Confidence (Abc) Scale. *J Gerontol.* 1998;53:M287-  
396 294.
- 397 43. Washburn RA, Smith KW, Jette AM, Janney CA. The Physical Activity Scale for the  
398 Elderly (Pase): Development and Evaluation. *J Clin Epidemiol.* 1993;46(2):153-162.
- 399 44. Washburn RA, McAuley E, Katula J, Mihalko SL, Boileau RA. The Physical Activity  
400 Scale for the Elderly (Pase): Evidence for Validity. *J Clin Epidemiol.* 1999;52(7):643-  
401 651.
- 402 45. Miyake A, Friedman NP, Emerson MJ, Witzki AH, Howerter A, Wager TD. The Unity  
403 and Diversity of Executive Functions and Their Contributions to Complex "Frontal  
404 Lobe" Tasks: A Latent Variable Analysis. *Cognit Psychol.* Aug 2000;41(1):49-100.
- 405 46. Spreen O, Strauss E. *A Compendium of Neurological Tests.* 2nd Edition ed. New York:  
406 Oxford University Press, Inc.; 1998.
- 407 47. Wechsler D. Wechsler Adult Intelligence Scale - Revised.: The Psychological  
408 Corporation, Harcourt Brace Jovanovich.; 1981.
- 409 48. Trenerry M, Crosson B, DeBoe J, Leber W. Stroop Neuropsychological Screening Test.  
410 Psychological Assessment Resources; 1988.
- 411 49. Kramer AF, Hahn S, Gopher D. Task Coordination and Aging: Explorations of  
412 Executive Control Processes in the Task Switching Paradigm. *Acta Psychol (Amst).* Apr  
413 1999;101(2-3):339-378.
- 414 50. Colcombe S, Kramer AF. Fitness Effects on the Cognitive Function of Older Adults: A  
415 Meta-Analytic Study. *Psychol Sci.* Mar 2003;14(2):125-130.
- 416 51. Kramer AF, Hahn S, Cohen NJ, et al. Ageing, Fitness and Neurocognitive Function.  
417 *Nature.* Jul 29 1999;400(6743):418-419.
- 418 52. Colcombe SJ, Kramer AF, Erickson KI, et al. Cardiovascular Fitness, Cortical  
419 Plasticity, and Aging. *Proc Natl Acad Sci U S A.* Mar 2 2004;101(9):3316-3321.
- 420 53. Tanne D, Freimark D, Poreh A, et al. Cognitive Functions in Severe Congestive Heart  
421 Failure before and after an Exercise Training Program. *International Journal of*  
422 *Cardiology.* 2005/8/18 2005;103(2):145-149.
- 423 54. Kubesch S, Bretschneider M, Freudenmann R, Weidenhammer M, M, Spitzer M, Gron  
424 G. Aerobic Endurance Exercise Improves Executive Functions in Depressed Patients.  
425 *Journal of Clinical Psychiatry.* 2003;64:1005-1012.
- 426 55. Dolan P. Modeling Valuations for Euroqol Health States. *Med Care.* Nov  
427 1997;35(11):1095-1108.
- 428 56. Brazier J, Roberts J, Deverill M. The Estimation of a Preference-Based Measure of  
429 Health from the Sf-36. *J Health Econ.* Mar 2002;21(2):271-292.

- 430 57. Marra CA, Woolcott JC, Kopec JA, et al. A Comparison of Generic, Indirect Utility  
431 Measures (the Hui2, Hui3, Sf-6d, and the Eq-5d) and Disease-Specific Instruments (the  
432 Raqol and the Haq) in Rheumatoid Arthritis. *Soc Sci Med.* Apr 2005;60(7):1571-1582.
- 433 58. Gardner MM, Buchner DM, Robertson MC, Campbell AJ. Practical Implementation of  
434 an Exercise-Based Falls Prevention Programme. *Age Ageing.* Jan 2001;30(1):77-83.
- 435 59. Oostenbrink JB, Al MJ, Rutten-van Molken MP. Methods to Analyse Cost Data of  
436 Patients Who Withdraw in a Clinical Trial Setting. *Pharmacoeconomics.*  
437 2003;21(15):1103-1112.
- 438 60. Briggs AH, Lozano-Ortega G, Spencer S, Bale G, Spencer MD, Burge PS. Estimating  
439 the Cost-Effectiveness of Fluticasone Propionate for Treating Chronic Obstructive  
440 Pulmonary Disease in the Presence of Missing Data. *Value Health.* Jul-Aug  
441 2006;9(4):227-235.
- 442 61. Ramsey S, Willke R, Briggs A, et al. Good Research Practices for Cost-Effectiveness  
443 Analysis Alongside Clinical Trials: The Ispor Rct-Cea Task Force Report. *Value*  
444 *Health.* Sep-Oct 2005;8(5):521-533.

445
